# Supplementary material
Source: HighWire-hosted journal article supplement (https://thorax.bmj.com/content/thoraxjnl-2018-212148)
Supplement: inline-supplementary-material-1 [file inline-supplementary-material-1.pdf]

## Supplementary material

| <b>Table S1: COPD-adjusted all-cause mortality rates, by age and sex</b> |                                 |                             |                                  |               |                              |               |                           |               |                                    |               |
|--------------------------------------------------------------------------|---------------------------------|-----------------------------|----------------------------------|---------------|------------------------------|---------------|---------------------------|---------------|------------------------------------|---------------|
| <i>Age</i>                                                               | <i>Unadjusted mortality (%)</i> |                             | <i>No deaths from all causes</i> |               | <i>No of death from COPD</i> |               | <i>% deaths from COPD</i> |               | <i>COPD adjusted mortality (%)</i> |               |
|                                                                          | <i>Male m<sub>x</sub></i>       | <i>Female m<sub>x</sub></i> | <i>Male</i>                      | <i>Female</i> | <i>Male</i>                  | <i>Female</i> | <i>Male</i>               | <i>Female</i> | <i>Male</i>                        | <i>Female</i> |
| 40                                                                       | 0.1577                          | 0.0883                      |                                  |               |                              |               |                           |               | 0.1559                             | 0.0876        |
| 41                                                                       | 0.1628                          | 0.0958                      |                                  |               |                              |               |                           |               | 0.1610                             | 0.0950        |
| 42                                                                       | 0.1692                          | 0.1058                      | 3282                             | 2125          | 37                           | 18            | 1.127%                    | 0.847%        | 0.1673                             | 0.1049        |
| 43                                                                       | 0.1884                          | 0.1157                      |                                  |               |                              |               |                           |               | 0.1863                             | 0.1147        |
| 44                                                                       | 0.2064                          | 0.1271                      |                                  |               |                              |               |                           |               | 0.2041                             | 0.1260        |
| 45                                                                       | 0.2251                          | 0.1383                      |                                  |               |                              |               |                           |               | 0.2224                             | 0.1364        |
| 46                                                                       | 0.2362                          | 0.1447                      |                                  |               |                              |               |                           |               | 0.2334                             | 0.1427        |
| 47                                                                       | 0.2505                          | 0.1623                      | 5108                             | 3286          | 61                           | 45            | 1.194%                    | 1.369%        | 0.2475                             | 0.1601        |
| 48                                                                       | 0.2680                          | 0.1711                      |                                  |               |                              |               |                           |               | 0.2648                             | 0.1688        |
| 49                                                                       | 0.2944                          | 0.1926                      |                                  |               |                              |               |                           |               | 0.2909                             | 0.1900        |
| 50                                                                       | 0.3106                          | 0.2159                      |                                  |               |                              |               |                           |               | 0.3050                             | 0.2110        |
| 51                                                                       | 0.3428                          | 0.2347                      |                                  |               |                              |               |                           |               | 0.3366                             | 0.2294        |
| 52                                                                       | 0.3709                          | 0.2561                      | 7076                             | 4856          | 127                          | 110           | 1.795%                    | 2.265%        | 0.3642                             | 0.2503        |
| 53                                                                       | 0.4075                          | 0.2784                      |                                  |               |                              |               |                           |               | 0.4002                             | 0.2721        |
| 54                                                                       | 0.4538                          | 0.2981                      |                                  |               |                              |               |                           |               | 0.4457                             | 0.2913        |
| 55                                                                       | 0.4877                          | 0.3408                      |                                  |               |                              |               |                           |               | 0.4727                             | 0.3277        |
| 56                                                                       | 0.5368                          | 0.3681                      |                                  |               |                              |               |                           |               | 0.5203                             | 0.3540        |
| 57                                                                       | 0.5980                          | 0.4042                      | 9689                             | 6501          | 298                          | 249           | 3.076%                    | 3.830%        | 0.5796                             | 0.3887        |
| 58                                                                       | 0.6629                          | 0.4394                      |                                  |               |                              |               |                           |               | 0.6425                             | 0.4226        |
| 59                                                                       | 0.7444                          | 0.4783                      |                                  |               |                              |               |                           |               | 0.7215                             | 0.4600        |
| 60                                                                       | 0.8034                          | 0.5239                      |                                  |               |                              |               |                           |               | 0.7649                             | 0.4898        |
| 61                                                                       | 0.8848                          | 0.5825                      |                                  |               |                              |               |                           |               | 0.8424                             | 0.5446        |
| 62                                                                       | 0.9726                          | 0.6303                      | 14289                            | 9677          | 685                          | 629           | 4.794%                    | 6.500%        | 0.9260                             | 0.5893        |
| 63                                                                       | 1.0394                          | 0.6778                      |                                  |               |                              |               |                           |               | 0.9896                             | 0.6337        |
| 64                                                                       | 1.1370                          | 0.7383                      |                                  |               |                              |               |                           |               | 1.0825                             | 0.6903        |
| 65                                                                       | 1.2185                          | 0.7968                      |                                  |               |                              |               |                           |               | 1.1448                             | 0.7371        |
| 66                                                                       | 1.3279                          | 0.8616                      |                                  |               |                              |               |                           |               | 1.2476                             | 0.7970        |
| 67                                                                       | 1.4714                          | 0.9686                      | 21901                            | 14938         | 1324                         | 1120          | 6.045%                    | 7.498%        | 1.3824                             | 0.8960        |
| 68                                                                       | 1.6263                          | 1.0806                      |                                  |               |                              |               |                           |               | 1.5280                             | 0.9996        |
| 69                                                                       | 1.8133                          | 1.1788                      |                                  |               |                              |               |                           |               | 1.7037                             | 1.0904        |
| 70                                                                       | 1.9994                          | 1.3208                      |                                  |               |                              |               |                           |               | 1.8568                             | 1.2100        |
| 71                                                                       | 2.2319                          | 1.4533                      |                                  |               |                              |               |                           |               | 2.0727                             | 1.3313        |
| 72                                                                       | 2.5597                          | 1.6612                      | 26311                            | 19268         | 1877                         | 1617          | 7.134%                    | 8.392%        | 2.3771                             | 1.5218        |
| 73                                                                       | 2.7619                          | 1.8449                      |                                  |               |                              |               |                           |               | 2.5649                             | 1.6901        |
| 74                                                                       | 3.0452                          | 2.0417                      |                                  |               |                              |               |                           |               | 2.8280                             | 1.8704        |
| 75                                                                       | 3.3765                          | 2.2788                      |                                  |               |                              |               |                           |               | 3.1415                             | 2.1080        |
| 76                                                                       | 3.7254                          | 2.5435                      |                                  |               |                              |               |                           |               | 3.4662                             | 2.3528        |
| 77                                                                       | 4.1036                          | 2.8630                      | 34589                            | 27917         | 2407                         | 2093          | 6.959%                    | 7.497%        | 3.8180                             | 2.6484        |
| 78                                                                       | 4.6518                          | 3.1770                      |                                  |               |                              |               |                           |               | 4.3281                             | 2.9388        |
| 79                                                                       | 5.0873                          | 3.6497                      |                                  |               |                              |               |                           |               | 4.7333                             | 3.3761        |
| 80                                                                       | 5.7954                          | 4.1666                      |                                  |               |                              |               |                           |               | 5.4247                             | 3.9050        |
| 81                                                                       | 6.5348                          | 4.6844                      |                                  |               |                              |               |                           |               | 6.1168                             | 4.3903        |
| 82                                                                       | 7.4171                          | 5.3068                      | 41831                            | 41029         | 2676                         | 2576          | 6.397%                    | 6.278%        | 6.9426                             | 4.9736        |
| 83                                                                       | 8.3147                          | 6.0756                      |                                  |               |                              |               |                           |               | 7.7828                             | 5.6941        |
| 84                                                                       | 9.3206                          | 7.0031                      |                                  |               |                              |               |                           |               | 8.7243                             | 6.5634        |
| 85                                                                       | 10.5538                         | 7.9108                      | 40126                            | 50909         | 2473                         | 2413          | 6.163%                    | 4.740%        | 9.9034                             | 7.5358        |

|    |         |         |       |       |      |      |        |         |         |         |
|----|---------|---------|-------|-------|------|------|--------|---------|---------|---------|
| 86 | 11.8388 | 8.9452  |       |       |      |      |        | 11.1092 | 8.5212  |         |
| 87 | 13.2144 | 10.1286 |       |       |      |      |        | 12.4000 | 9.6485  |         |
| 88 | 14.7896 | 11.3019 |       |       |      |      |        | 13.8781 | 10.7662 |         |
| 89 | 16.5102 | 12.9950 |       |       |      |      |        | 15.4927 | 12.3791 |         |
| 90 | 18.1566 | 14.6089 |       |       |      |      |        | 17.2139 | 14.1632 |         |
| 91 | 20.1408 | 16.3333 |       |       |      |      |        | 19.0951 | 15.8350 |         |
| 92 | 23.2343 | 18.7654 | 25635 | 47921 | 1331 | 1462 | 5.192% | 3.051%  | 22.0279 | 18.1929 |
| 93 | 25.0647 | 20.4129 |       |       |      |      |        |         | 23.7633 | 19.7901 |
| 94 | 26.2338 | 22.5065 |       |       |      |      |        |         | 24.8717 | 21.8199 |
| 95 | 29.7602 | 24.6122 |       |       |      |      |        |         | 28.7283 | 24.1998 |
| 96 | 33.3723 | 28.7120 |       |       |      |      |        |         | 32.2151 | 28.2309 |
| 97 | 36.4647 | 30.8803 |       |       |      |      |        |         | 35.2003 | 30.3628 |
| 98 | 39.6400 | 33.8692 | 7008  | 22856 | 243  | 383  | 3.467% | 1.676%  | 38.2655 | 33.3017 |
| 99 | 42.0893 | 37.4876 |       |       |      |      |        |         | 40.6299 | 36.8594 |
| 10 |         |         |       |       |      |      |        |         |         |         |
| 0  | 43.2971 | 39.5028 |       |       |      |      |        |         | 41.7958 | 38.8408 |

**Table S2 Active case finding processes and cost assumption per patient**

| Process                                   | Assumption                                                                                         | Cost (£) |
|-------------------------------------------|----------------------------------------------------------------------------------------------------|----------|
| <b>Searches, screening</b>                |                                                                                                    |          |
| Running the search                        | 20 minute of practice manager time per practice                                                    | 0.01     |
| Screening patient list                    | 1 minute of GP time per patient selected                                                           | 3.20     |
| Attaching flags                           | 15 seconds of administration time per patient record                                               | 0.94     |
| Total                                     |                                                                                                    | 4.15     |
| <b>Questionnaires</b>                     |                                                                                                    |          |
| Drafting/approving letter                 | 1 hour of practice manager time per practice per mail out                                          | 0.05     |
| Administering mail-merge x 3              | 2 hours of administration time per practice per mail out                                           | 0.08     |
| Administration the postal questionnaires  | 1.8 minutes of administration time per letter sent, plus stationery cost                           | 0.67     |
| Stationery cost for postal questionnaire  | 6 sheets of headed note paper & letter head, stamp, envelope & return envelope                     | 1.74     |
| Total / questionnaire                     |                                                                                                    | 2.55     |
| <b>Administrative</b>                     |                                                                                                    |          |
| Completing the questionnaire in-clinic    | 6 sheets of headed notepaper & 1 minute of GP time per questionnaire                               | 3.84     |
| Processing questionnaires and appointment | 30 minutes of administration time per questionnaire completed                                      | 11.23    |
| <b>Appointment booking</b>                |                                                                                                    |          |
| Book appointments                         | 10 minutes, stamp, letter and envelope for 100% and text message for 49% of appointments           | 4.32     |
| cancelled or rebooked                     | All booked appointments divided by appointment attended                                            | 1.91     |
| Total / appointment                       |                                                                                                    | 8.26     |
| <b>Spirometry</b>                         |                                                                                                    |          |
| Staff costs                               | 50 minutes clinical support worker time, 3 minutes of reception time                               | 22.04    |
| Training                                  | 4 weeks training, 2-day workshop, 1-day refresher course. Annual cost, assuming 372 tests per year | 4.33     |
| Room costs                                | 50 minutes per appointment                                                                         | 12.55    |
| Travel costs                              | Average 2.85 miles per attendance, 40p per mile                                                    | 1.14     |
| Equipment                                 | Use of spirometer and laptop. Single use of mouthpiece, spacer and salbutamol.                     | 10.87    |
| Total                                     |                                                                                                    | 50.95    |

\*Detailed micro-costing methods for the active-case finding has been published in an earlier paper <sup>Error! Reference source not found.</sup>

**Table S3 Annual routine healthcare utilisation cost by severity**

| Healthcare                              | GOLD 1        | GOLD 2        | GOLD 3        | GOLD 4        | Unit cost (£)       |
|-----------------------------------------|---------------|---------------|---------------|---------------|---------------------|
| Secondary care annual review (visits)   | 0.5           | 0.5           | 0.5           | 1.25          | 138.0 <sup>41</sup> |
| Primary care annual review (visits)     | 0.5           | 0.5           | 0.5           | 1.25          | 67.0 <sup>41</sup>  |
| Secondary care spirometry (tests)       | 0.5           | 0.5           | 1             | 1             | 50.9 <sup>52</sup>  |
| Primary care spirometry (tests)         | 0.5           | 0.5           | 1             | 1             | 18.0 <sup>52</sup>  |
| Flu vaccination (treatment uptake rate) | 1             | 1             | 1             | 1             | 6.6 <sup>53</sup>   |
| Oxygen Therapy (days)                   | 0             | 0             | 1.22          | 6.08          | 15.0 <sup>52</sup>  |
| Prescriptions per annum (GP)            | 1             | 1             | 2             | 3             | 22.9 <sup>42</sup>  |
| <b>Annual cost (£)</b>                  | <b>164.56</b> | <b>267.06</b> | <b>394.01</b> | <b>541.06</b> |                     |
| <b>Quarterly cost (£)</b>               | <b>41.14</b>  | <b>66.77</b>  | <b>98.50</b>  | <b>135.2</b>  |                     |

**Table S4 Tariff and average cost of hospital admission for COPD exacerbation**

| HRG code | Description                                                                                              | Tariff (£) |       | Activities |          | Weighted cost (£) |         |
|----------|----------------------------------------------------------------------------------------------------------|------------|-------|------------|----------|-------------------|---------|
|          |                                                                                                          | 2011       | 2015  | Total      | COPD     | 2011              | 2015    |
| DZ21A    | COPD or bronchitis with length of stay 1 day or less discharged home                                     | 475        | 499   | 72,547     | 62,390   | 187.12            | 196.58  |
| DZ21B    | COPD or bronchitis with intubation with major complications                                              | 3718       | 2,649 | 129        | 111      | 2.60              | 1.86    |
| DZ21C    | COPD or bronchitis with intubation with complications                                                    | 2621       | 2,567 | 27         | 23       | 0.38              | 0.38    |
| DZ21E    | COPD or bronchitis with non-invasive ventilation without intubation with major complications             | 3684       | 3,696 | 3,777      | 3,248    | 75.56             | 75.80   |
| DZ21F    | COPD or bronchitis with non-invasive ventilation without intubation with complications                   | 2678       | 2,909 | 1,106      | 951      | 16.08             | 17.47   |
| DZ21G    | COPD or bronchitis with non-invasive ventilation without intubation without complications                | 2168       | 1,637 | 246        | 212      | 2.90              | 2.19    |
| DZ21H    | COPD or bronchitis without non-invasive ventilation without intubation with major complications          | 3819       | 4,190 | 40,006     | 34,405   | 829.64            | 910.23  |
| DZ21J    | COPD or bronchitis without non-invasive ventilation without intubation with complications                | 2475       | 3,075 | 52,870     | 45,468   | 710.56            | 882.81  |
| DZ21K    | Chronic Obstructive Pulmonary Disease or Bronchitis without NIV without Intubation without complications | 1849       | 2,442 | 13,448     | 11,565   | 135.02            | 178.33  |
| Total    |                                                                                                          |            |       | 184156     | 158374.2 | 1959.87           | 2265.65 |

**Table S5 Estimated cost of severe exacerbation**

| Resource use                                  | % requiring resource | Unit cost (£)  |
|-----------------------------------------------|----------------------|----------------|
| Average cost of COPD hospital stay            | 0.80                 | 2,265          |
| Average cost of hospital at home program      | 0.20                 | 1,803          |
| Community nurse follow up                     | 0.30                 | 67             |
| GP follow up (12 minute visit)*               | 0.30                 | 45             |
| Outpatient appointment follow up <sup>†</sup> | 0.40                 | 140            |
| <b>Total</b>                                  |                      | <b>2263.00</b> |

\*Per hour of General Medical Service (GMS) activity

<sup>†</sup>Per hour of patient contact

## Transition probabilities within stable state

The Health Improvement Network (THIN) database is a large primary care database containing patient-level data on over 550 general practitioners across the UK.

**Table S6 Criteria for defining THIN cohort**

|   |                                                                                |
|---|--------------------------------------------------------------------------------|
| 1 | Aged 40 or older on or before April 1,2012                                     |
| 2 | Confirmed diagnosis of COPD before April 1, 2012                               |
| 3 | Alive and actively registered to a general practice on or before April 1, 2012 |
| 4 | Valid spirometry result within the previous 12 months before April 1, 2012     |

Demographic information and spirometry results on all registered COPD patients were extracted from the database. The extracted data was cleaned and a closed cohort of COPD patients was defined based on eligibility criteria in Table S6. Transitions between GOLD stages as well as mortality rates were computed after one year follow-up. In line with assumption that COPD is a slow progressive disease, worsening or improvement in lung function beyond the next health state was censored as shown in Table S7. Less than 1% of the THIN population was restricted by this assumption over the 12 months period. Given that the exact number of patients moving between the health states was known, compared to using reported data in the literature, a transition matrix was developed and a Dirichlet distribution was used to vary the probabilities in the sensitivity analysis.

**Table S7 Annual transition matrix generated from the THIN database**

|        |       | stage 1 | stage 2 | stage 3 | stage 4 | dead   |
|--------|-------|---------|---------|---------|---------|--------|
| GOLD 1 | 40-59 | 0.9047  | 0.0876  | #       | #       | 0.0077 |
|        | 60-79 | 0.8565  | 0.1139  | #       | #       | 0.0296 |
|        | 80-84 | 0.7864  | 0.0975  | #       | #       | 0.1161 |
| GOLD 2 | 40-59 | 0.051   | 0.9001  | 0.0362  | #       | 0.0128 |
|        | 60-79 | 0.0487  | 0.8618  | 0.0438  | #       | 0.0457 |
|        | 80-84 | 0.0435  | 0.8009  | 0.0351  | #       | 0.1205 |
| GOLD 3 | 40-59 | #       | 0.1044  | 0.8368  | 0.0324  | 0.0265 |
|        | 60-79 | #       | 0.0953  | 0.8035  | 0.0286  | 0.0727 |
|        | 80-84 | #       | 0.0828  | 0.705   | 0.0161  | 0.1961 |
| GOLD 4 | 40-59 | #       | #       | 0.0936  | 0.8187  | 0.0877 |
|        | 60-79 | #       | #       | 0.1198  | 0.7401  | 0.1401 |
|        | 80-84 | #       | #       | 0.1756  | 0.6031  | 0.2214 |

**Table S8 Probability of severe exacerbation and corresponding beta distribution by GOLD stage**

| Severity | Sample | Mean number per annum | Annual Probability | $\alpha$ | $\beta$ | Source |
|----------|--------|-----------------------|--------------------|----------|---------|--------|
| GOLD 1   | 1034   | 0.0270                | 0.0266             | 28       | 1006    | BLISS  |
| GOLD 2   | 846    | 0.0760                | 0.0732             | 62       | 784     | BLISS  |
| GOLD 3   | 265    | 0.2720                | 0.2381             | 63       | 202     | BLISS  |
| GOLD 4   | 46     | 0.3480                | 0.2939             | 14       | 32      | BLISS  |

**Additional references:**

- 52. Hertel N, Kotchie RW, Samyshkin Y, Radford M, Humphreys S, Jameson K. Cost-effectiveness of available treatment options for patients suffering from severe COPD in the UK: a fully incremental analysis. *Int J Chron Obstruct Pulmon Dis* 2012; 7: 183-99.
- 53. Department of Health. The seasonal influenza immunisation programme Consultation: a review of the procurement of seasonal flu vaccine. 2011. [https://assets.publishing.service.gov.uk/government/uploads/system/uploads/attachment\\_data/file/215577/dh\\_127231.pdf](https://assets.publishing.service.gov.uk/government/uploads/system/uploads/attachment_data/file/215577/dh_127231.pdf) [Accessed 17/11/2016]

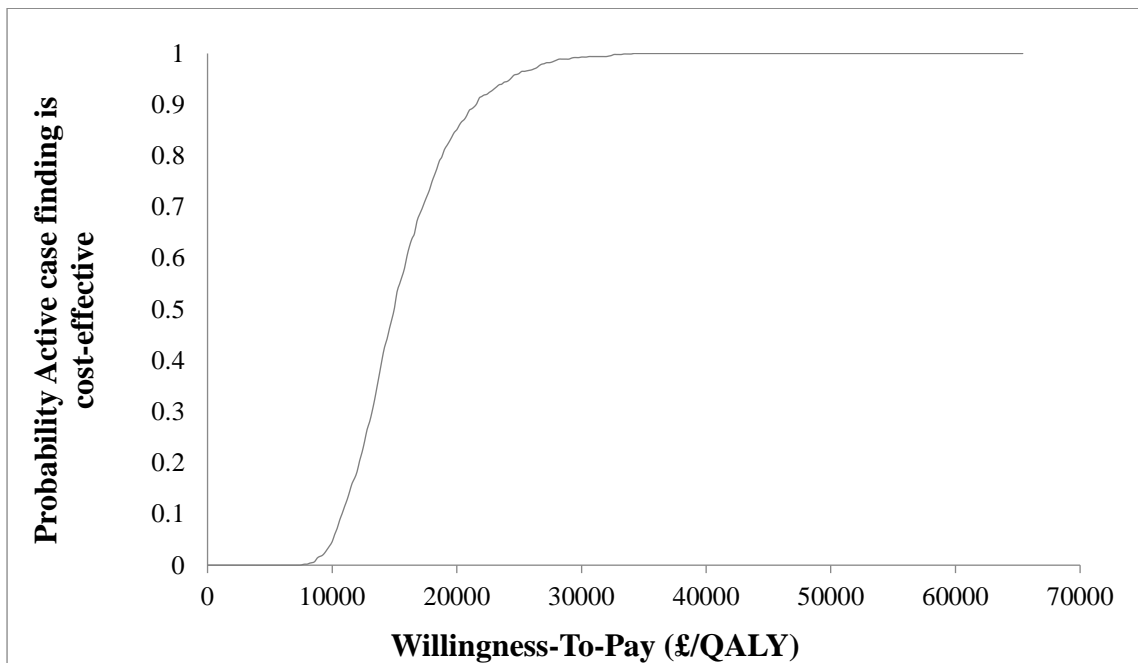

**Figure S1: Cost-effectiveness acceptability curve comparing systematic case-finding is cost-effective with routine case-finding, based on 10,000 jointly resampled cost-QALY estimates**

Sensitivity Analysis on TxEffect\_Exacerb and TxEffect\_Mortality  
(Net Benefit, WTP=20000.0)

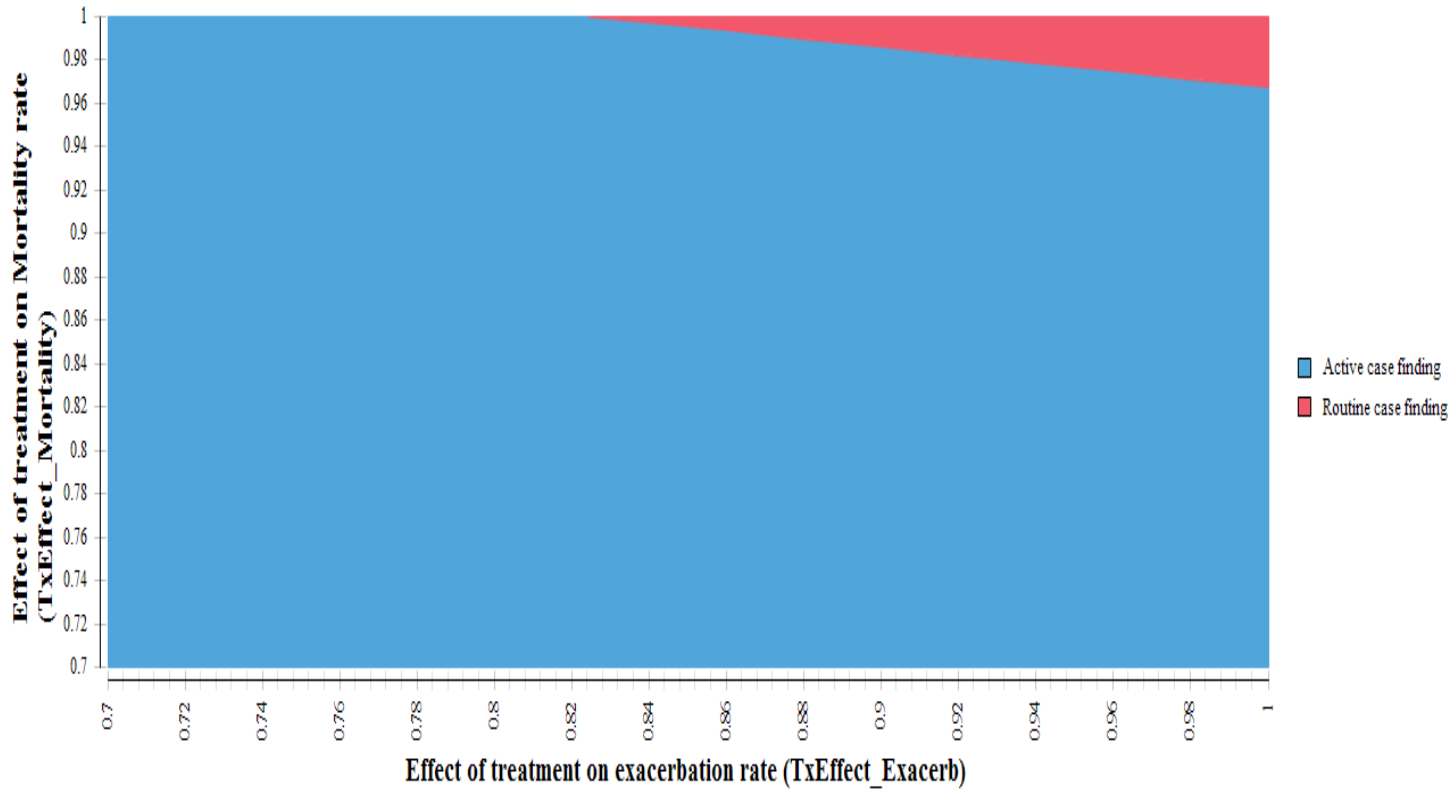

3-way interval

Animate >>

<< Animate

Effect of treatment on progression = 0.92

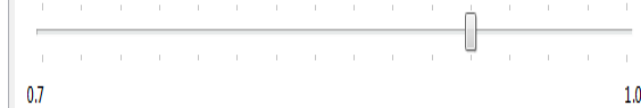

Actions

[Edit Chart](#)

— [Text Reports](#) —

[Text Report \(flat\)](#)

— [Other Reports](#) —

[83 Way... points](#)

Figure S1: Animation snapshot of a three-way sensitivity analysis, showing the relationship between the effect of treatment on exacerbation (OR=0.7 to 1.0), mortality (OR=0.7 to 1.0) and disease progression (OR=0.92). The willingness-to-pay threshold was set at £20,000 per QALY. As the OR for the effect of treatment on disease progression shifts from 0.92 to 1.00, the probability that routine practice being cost-effective increases: The red area expands.
